# Supplementary material for: Intermittent Hypoxic Therapy Inhibits Allogenic Bone-Graft Resorption by Inhibition of Osteoclastogenesis in a Mouse Model
Source: MDPI journal article supplement (doi:10.3390/ijms23010323), 2021-12-28
Supplement: s1 [file s1]

Supplementary Materials

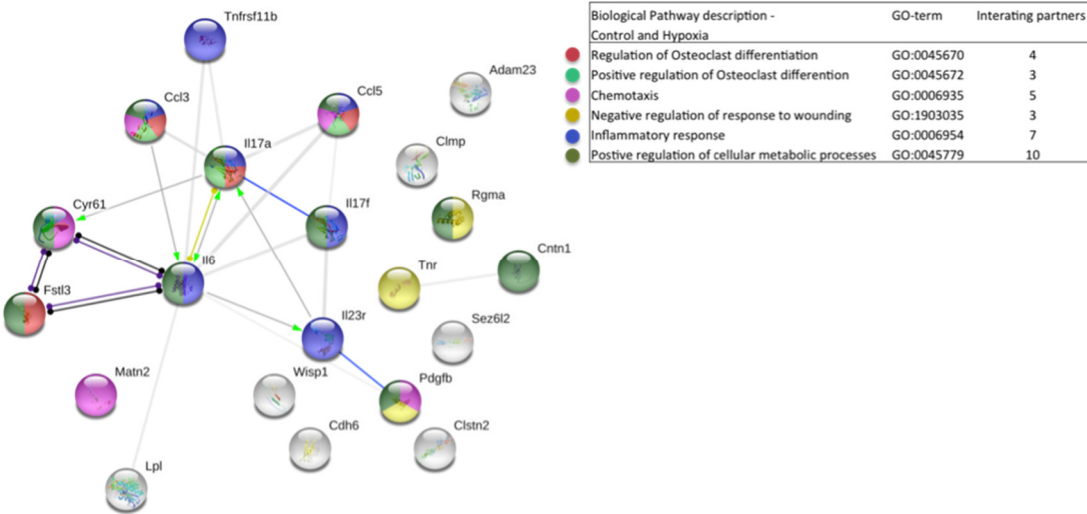

**Figure S1.** Key proteins of interest after 1 week. Graphical representation of biological pathways and interactions of significant proteins, control vs. IHT, after 1 week. The same coloring indicates the same biological pathway description. Data are extracted from STRING version 11.0 (string-db.org).

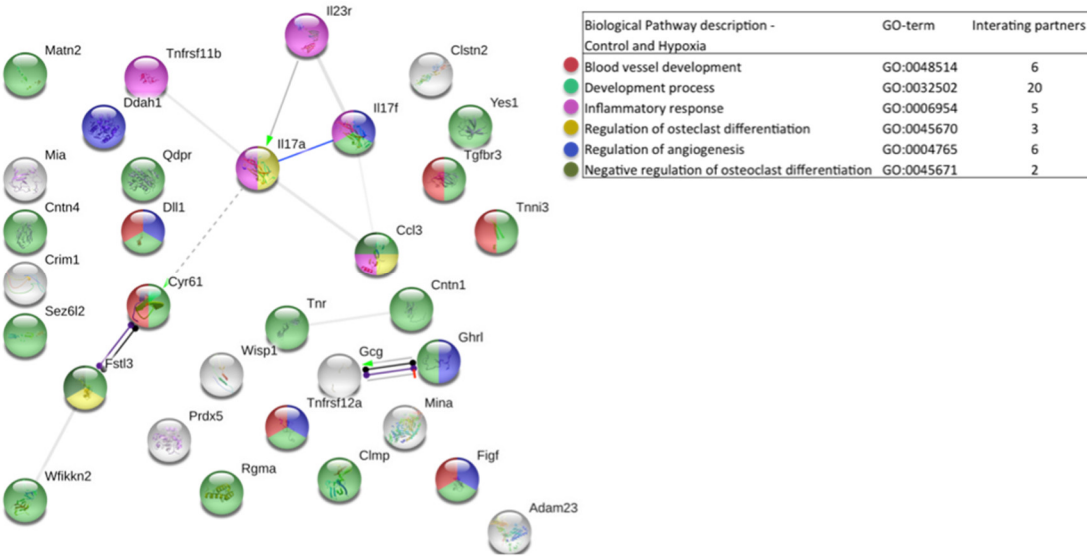

**Figure S2.** Key proteins of interest after 4 weeks. Biological pathways and interactions of significant proteins, control vs. IHT, after 4 weeks. The same coloring indicates the same biological pathway description. Data are extracted from STRING version 11.0 (string-db.org).
